# Supplementary material for: Ambient hydrolysis deposition of TiO2 in nanoporous carbon and the converted TiN–carbon capacitive electrode
Source: Royal Society of Chemistry journal article supplement (doi:10.1039/c3ta14278g), 2014-01-01
Supplement: c3ta14278g.pdf [file c3ta14278g.pdf]

## Supporting Information

### **Ambient Hydrolysis Deposition of TiO<sub>2</sub> in Nanoporous Carbon and the Converted TiN/Carbon Capacitive Electrode**

Xingfeng Wang,<sup># a</sup> Vadivukarasi Raju,<sup># a</sup> Wei Luo,<sup>a</sup> Bao Wang,<sup>a</sup> William F. Stickle<sup>b</sup> and Xiulei Ji<sup>\*a</sup>

<sup>a</sup>Department of Chemistry, Oregon State University, Corvallis, Oregon, 97331, United States

<sup>b</sup>Hewlett-Packard Co., 1000 NE Circle Blvd., Corvallis, Oregon 97330, United States

**\* Email: david.ji@oregonstate.edu**

<sup>#</sup> These authors contributed equally to this work.

## **Experimental section:**

CMK-3 was prepared by a nanocasting method following the well-established procedure in the literature by employing SBA-15 as a hard template.<sup>1</sup>

### **The AHD Process:**

#### **Step I: Surface functionalization**

Typically, CMK-3, 0.3 g, was added to a freshly-prepared aqueous solution of  $(\text{NH}_4)_2\text{S}_2\text{O}_8$ , (1.0 M) and  $\text{H}_2\text{SO}_4$ , (2.0 M) (30 ml). The mixture was stirred at 60 °C for 6 hrs. Then, the oxidized CMK-3 (C-APS) was filtered, rinsed with deionized water and dried overnight in an oven at 80 °C.

#### **Step II: Water loading**

Degassed C-APS, 50 mg, was loaded into a plastic syringe in a glovebox. The carbon-containing syringe was warmed up in an oven at 80 °C before water loading to prevent water condensation on the syringe side wall and the external surface of C-APS particles. A narrow-mouth bottle of 500 ml volume that contains water 100 ml was heated in an oven at 80 °C. We used the warmed-up carbon-containing syringe to take in a certain volume of water-vapor/air mixture for a desired amount of water loading. The needle of the syringe was sealed after water loading. Then, the syringe was shaken by a vortex mixer for 5 mins at 80°C in order to enable good contact of water vapor with C-APS before the syringe was kept in an oven at 60 °C for half an hour. For the reference level of water loading, a vial containing C-APS was 'soaked' in water-vapor/air mixture in a larger narrow-mouth bottle that contained water in an oven at 80 °C.

#### **Step III: Hydrolysis deposition of $\text{TiO}_2$**

Water-loaded C-APS samples were soaked for an hour in a dilute solution of titanium tetrakisopropoxide (TTIP) in 1,3-dioxolane (DOXL) (5 vol%). The product was collected by

filtration in a glovebox. Samples were heated at 250 °C under nitrogen before N<sub>2</sub> sorption measurements and nitridation.

### **Nitridation of C-TiO<sub>2</sub>-100**

Samples were heated in a tube furnace at 850 °C for 6 hrs under NH<sub>3</sub> with a flow rate of 54 cc/min.

### **Formation of activated carbon**

Carbon microfiber of 2 g (Osaka Gas Co., Ltd) was heated in quartz tube furnace at 910 °C under CO<sub>2</sub> with a flow rate of 100 ml/min for 18 hrs.

### **Boehm titration procedure**

The amount of surface functional groups was determined using Boehm titration. In Boehm titration, the following assumptions were made to distinguish between the carbon-oxygen functionalities based on their acidity: NaOH is the strongest base and it neutralizes all Brønsted acids, including phenols, lactonic and carboxylic groups, while NaCO<sub>3</sub> neutralizes carboxylic and lactonic groups and NaHCO<sub>3</sub> neutralizes only carboxylic acid groups. Briefly, C-APS, 0.2 g, was dispersed in 20 ml of 0.05 M NaHCO<sub>3</sub> solution and the mixture was stirred for 48 hrs. The solution was then allowed to remain quiescent for 24 hrs. The aliquot (neutralized with 0.05 M conc. HCl) of 5 ml was back titrated against standardized NaOH solution using phenolphthalein as indicator.

### **Characterization methods:**

X-Ray diffraction (XRD) patterns were collected using a Rigaku Ultima IV Diffractometer with Cu K $\alpha$  irradiation ( $\lambda = 1.5406 \text{ \AA}$ ). Nitrogen sorption measurements were performed on a Micromeritics TriStar II 3020 analyzer at 77.4 K. The samples were outgassed at 250 °C under N<sub>2</sub> for 12 hrs prior to the N<sub>2</sub> sorption measurements. X-ray Photoelectron

Spectroscopy (XPS) measurements were performed in a Physical Electronics Quantera Scanning ESCA Microprobe with a focused monochromatic Al K $\alpha$  X-ray (1486.6 eV) source for excitation. The X-ray beam used was a 25 W, 100  $\mu$ m X-ray beam spot at the sample. The binding energy (BE) scale was calibrated using the Cu 2p<sub>3/2</sub> feature at 932.62  $\pm$  0.05 eV and Au 4f at 83.96  $\pm$  0.05 eV. The ion gun used in this system was a standard Quantera ion gun, and the sputter depth profiles were acquired using a 1 KeV argon-ion beam rastered over a 3 mm x 3 mm area. To minimize charging artifacts, the XPS data were collected with 1 eV, 20  $\mu$ A electrons and low-energy Ar<sup>+</sup> ions. The morphology was examined by field emission scanning electron microscopy (FESEM) using an FEI NOVA 230 high resolution SEM with an energy-dispersive X-ray (EDX) attachment. Transmission electron microscopy (TEM) and high-resolution transmission electron microscopy (HRTEM) images were recorded by an FEI Titan 80-300 TEM. High angle annular dark field scanning TEM (HAADF-STEM) measurements were carried out on an FEI Titan 80-200 microscope coupled with a HAADF detector and an EDX spectrometer.

### **Electrochemical Measurements:**

A two-electrode cell configuration was used to measure the electrochemical performance of samples. Electrodes were composed of 90 wt% active mass and 10 wt% poly(vinylidene fluoride) binder. The materials were slurry-cast from a cyclopentanone suspension onto a carbon-fiber paper current collector (Model: 2050A). The electrodes were dried at 120 °C under vacuum for 12 hrs and then cut into 10 mm disks. The active mass loadings are  $\sim$ 1 mg/cm<sup>2</sup>. Then, two identical (by weight and size) electrodes were assembled in coin-type cells that use polypropylene films as the separator and a CH<sub>3</sub>CN solution of 1.0 M ammonium tetrafluoroborate (NH<sub>4</sub>BF<sub>4</sub>) as the electrolyte. Cyclic voltammetry (CV), galvanostatic charge/discharge, and EIS were carried out on a VMP-3 multi-channel workstation at room

temperature. CV and charge/discharge profiles were collected in a voltage window from 0 to 2.5 V. EIS was carried out with the potential amplitude of 10 mV at the frequency range of 200 kHz to 10 mHz. The voltage drop at the beginning of discharge ( $V_{drop}$ ) is used to estimate the equivalent series resistance,  $R_{ESR}$ , at a constant current of  $I$  with the formula of  $R_{ESR} = V_{drop}/(2I)$ .

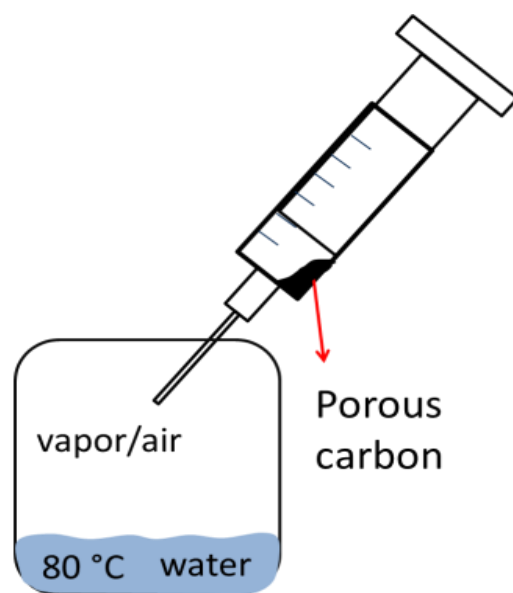

**Fig. S1.** Schematic showing water-loading by a porous-carbon-containing syringe.

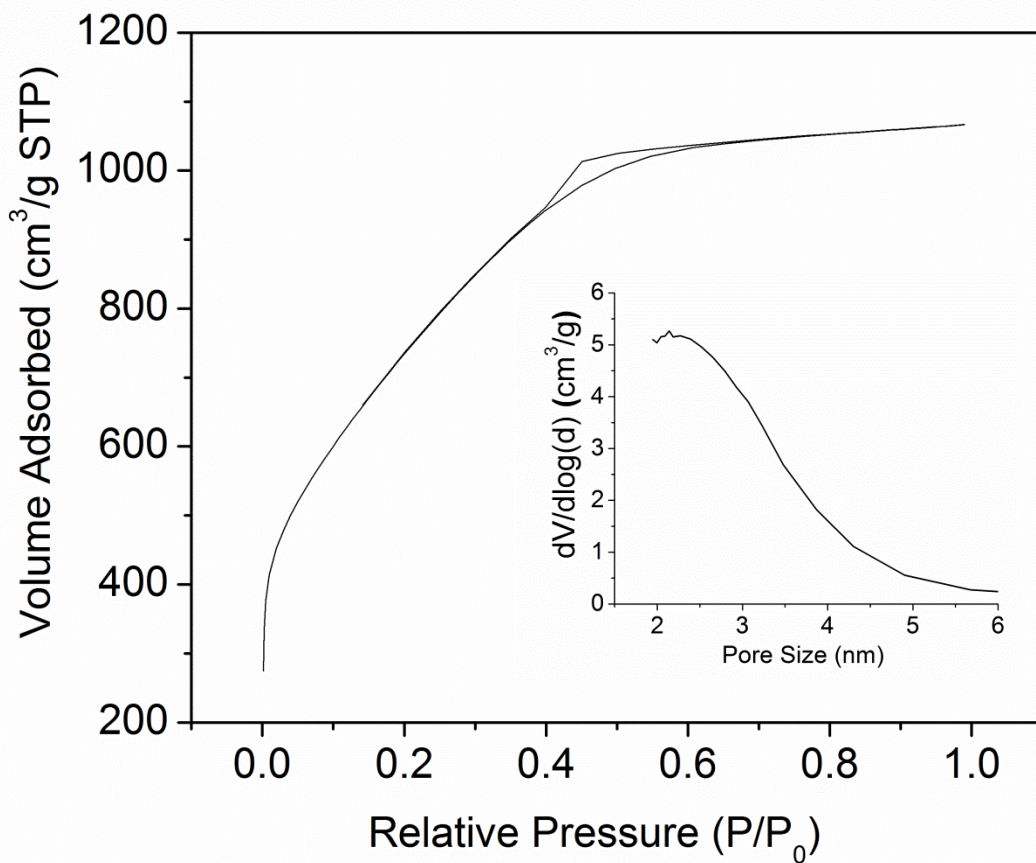

**Fig. S2.** N<sub>2</sub> isotherms of the CO<sub>2</sub> activated carbon. Inset: pore size distribution.

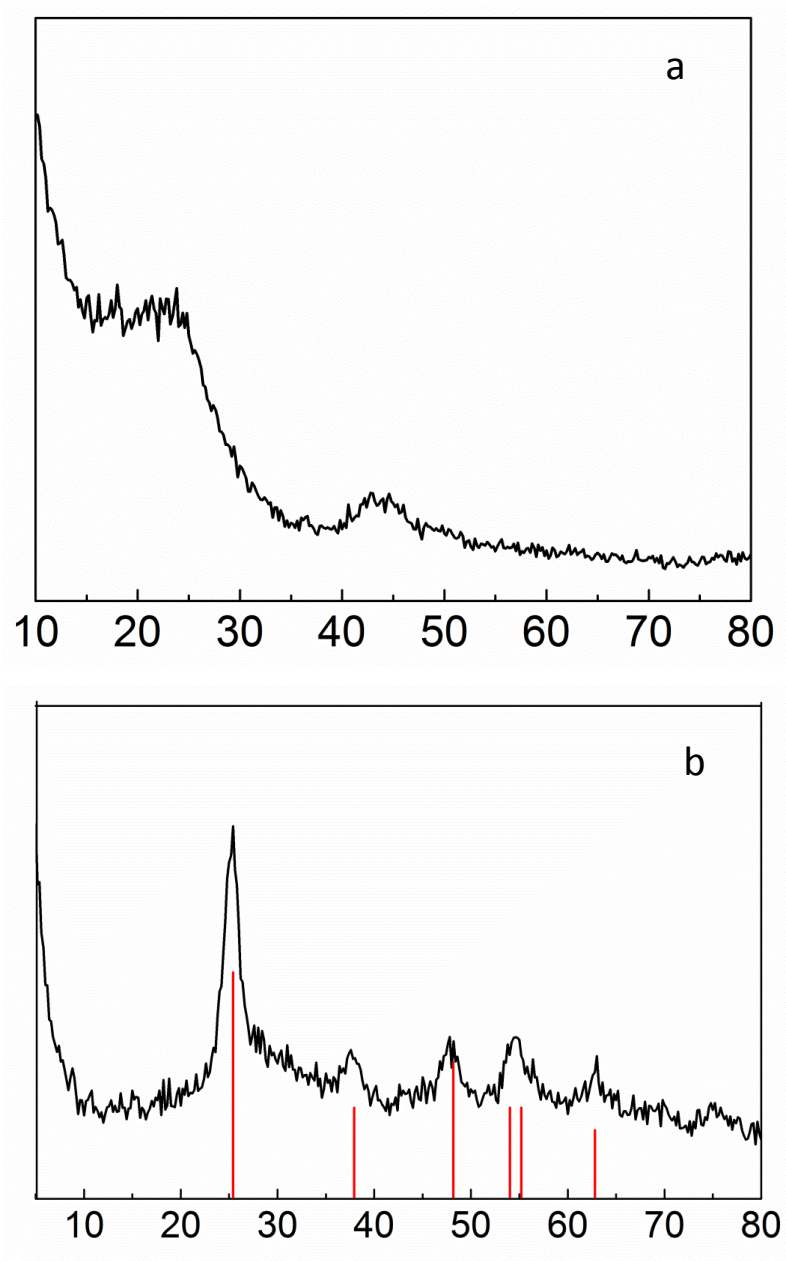

**Fig. S3.** XRD patterns of a) C-TiO<sub>2</sub>-100 and b) bulk TiO<sub>2</sub> powder.



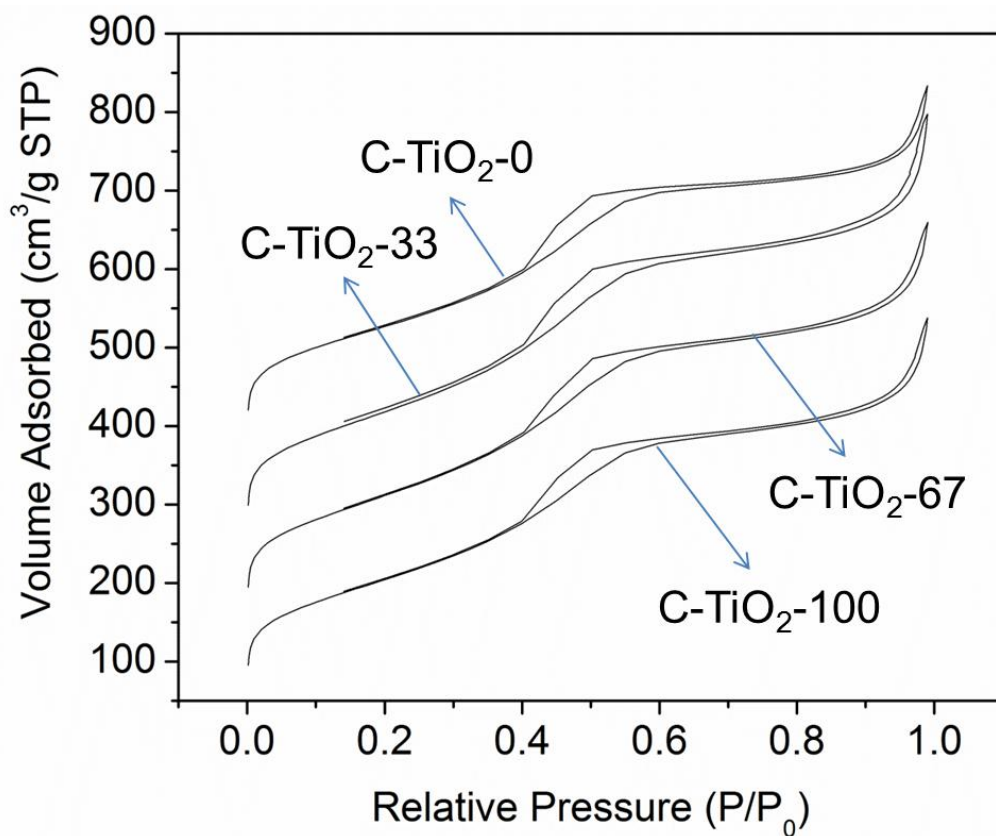

**Fig. S4.** N<sub>2</sub> isotherms of TiO<sub>2</sub>/carbon nanocomposites. C-TiO<sub>2</sub>-67, C-TiO<sub>2</sub>-33 and C-TiO<sub>2</sub>-0 are moved upward by 100, 200, and 300 cm<sup>3</sup>/g STP, respectively, for a better comparison of the curves.

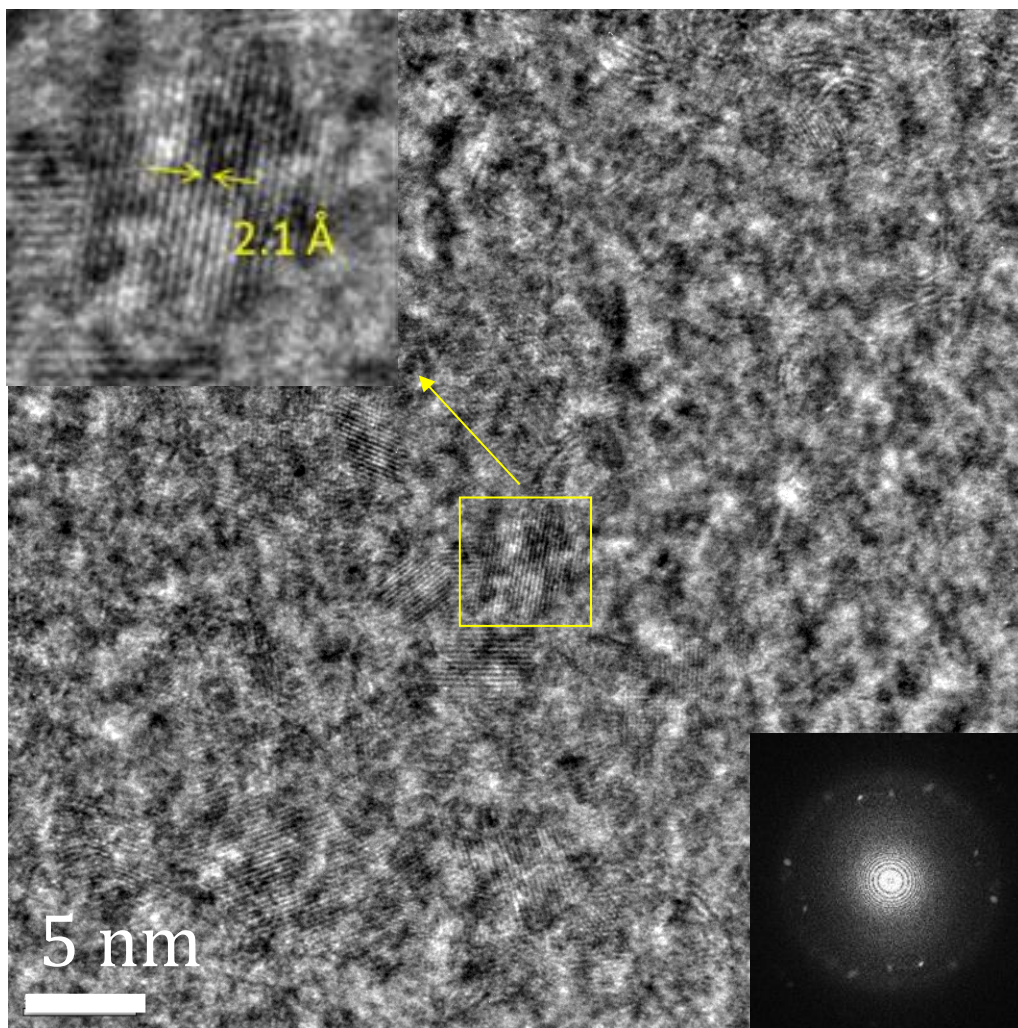

**Fig. S5** HRTEM images of C-TiN, corresponding selected area electron diffraction (inset bottom right) and an enlarged image of a representative TiN particle with a d-spacing of 2.1 Å (inset top left).

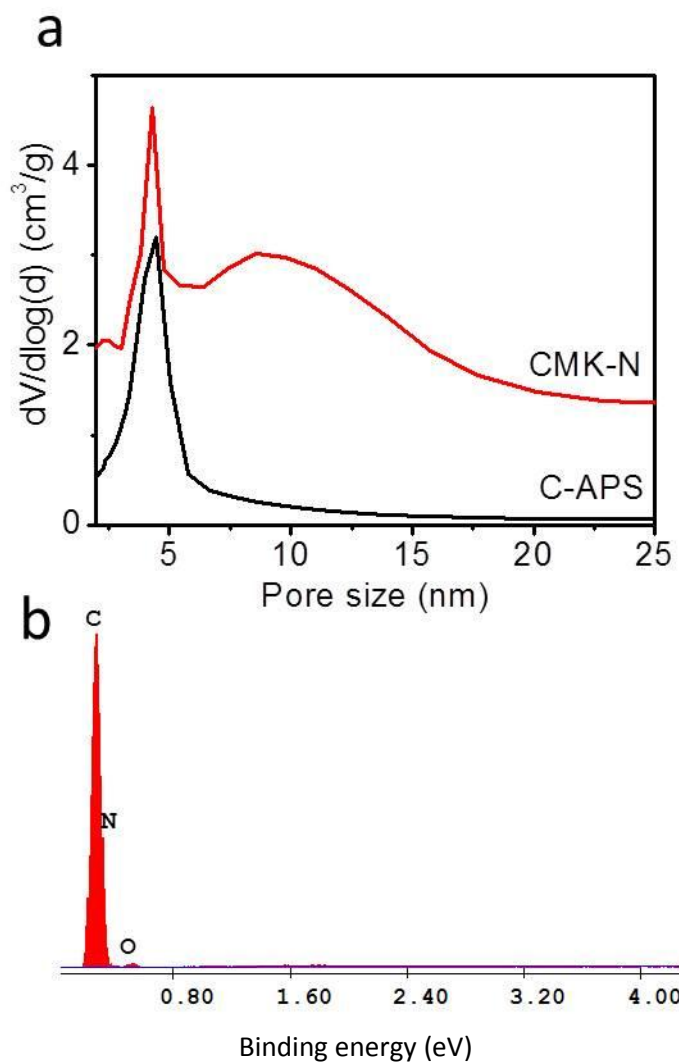

**Fig. S6** a) Pore size distribution profiles of C-APS and CMK-N. b) EDX analysis for CMK-N.

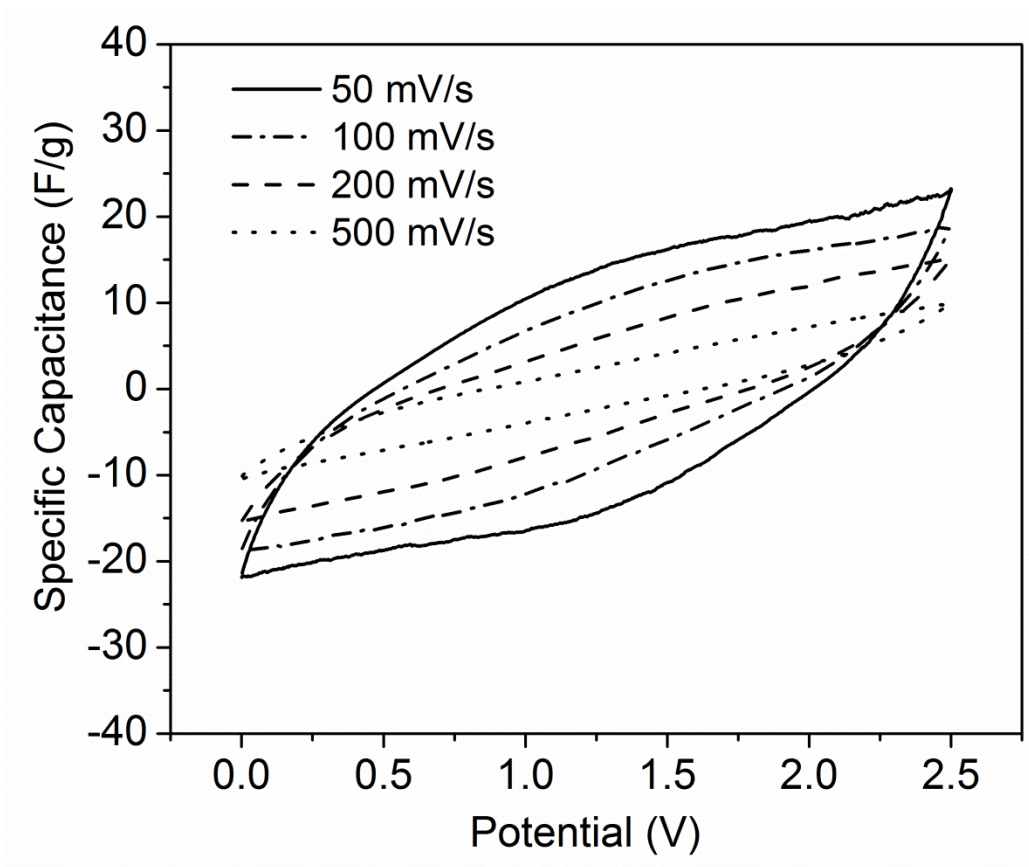

**Fig. S7.** CV curves of CMK-N at different scanning rates.

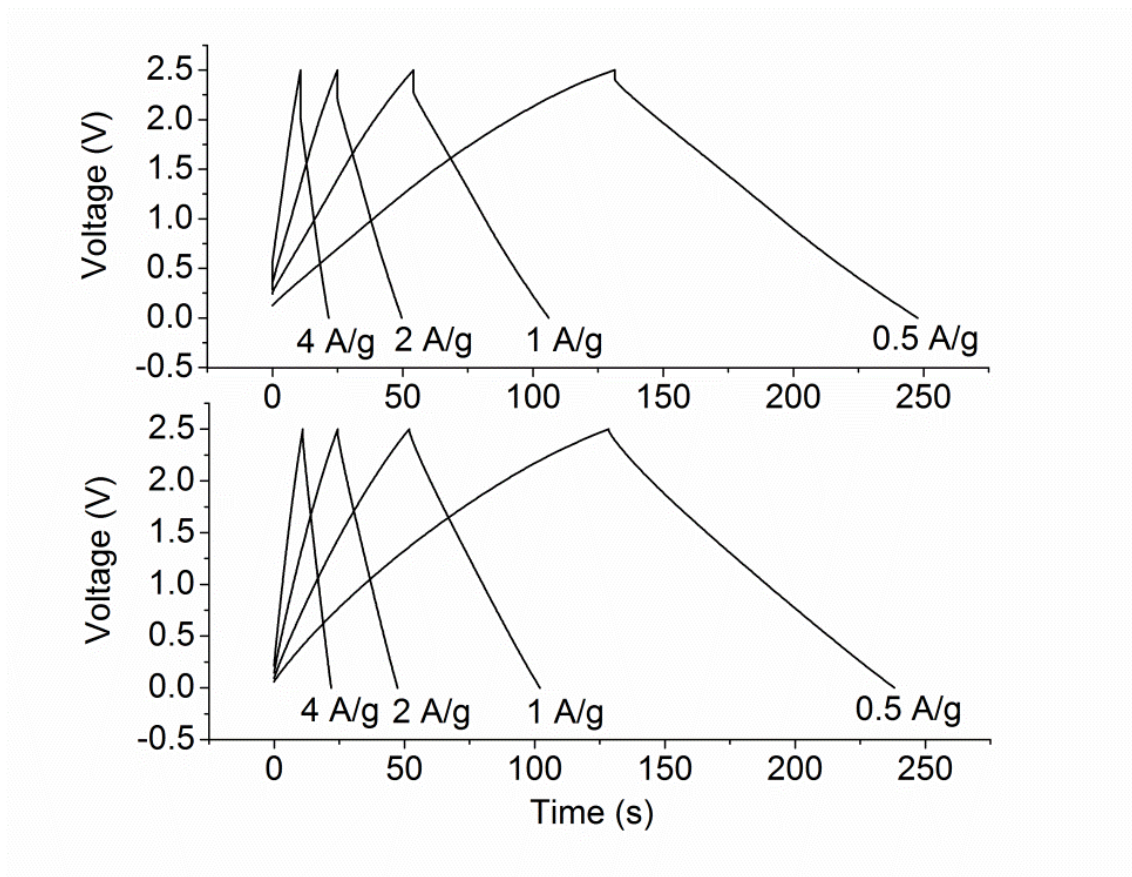

**Fig. S8.** Galvanostatic charge/discharge profiles at different current rates.

---

<sup>1</sup> D. Zhao, J. Feng, Q. Huo, N. Melosh, G. H. Fredrickson, B. F. Chmelka, G. D. Stucky, *Science* 1998, **279**, 548-552.
